# Supplementary material for: Comparison and Evaluation of Different Pit-Filling Methods for Generating High Resolution Canopy Height Model Using UAV Laser Scanning Data
Source: MDPI journal article supplement (doi:10.3390/rs13122239), 2021-06-08
Supplement: s1 [file s1]

# Comparison and Evaluation of Different Pit-Filling Methods for Generating High Resolution Canopy Height Model Using UAV Laser Scanning Data

Ying Quan, Mingze Li\*, Yuanshuo Hao and Bin Wang

Key Laboratory of Sustainable Forest Ecosystem Management-Ministry of Education, School of Forestry, Northeast Forestry University, Harbin 150040, Heilongjiang, China; quanying@nefu.edu.cn (Y.Q.); haoyuanshuo@nefu.edu.cn (Y.H.); wangbin@nefu.edu.cn (B.W.)

\* Correspondence: mingzelee@nefu.edu.cn; Tel.: +86-0451-8219-1341

**Table S1.** The RMSE (m) of CHM<sub>Reference</sub> and filtered CHMs with different window size in different proportion of pits.

|            | Proportion<br>of pits | CHM <sub>Mean</sub> |        |        | CHM <sub>Median</sub> |        |        | CHM <sub>Gaussian</sub> |        |        |
|------------|-----------------------|---------------------|--------|--------|-----------------------|--------|--------|-------------------------|--------|--------|
|            |                       | 3*3                 | 5*5    | 7*7    | 3*3                   | 5*5    | 7*7    | 3*3                     | 5*5    | 7*7    |
| Cone       | 10%                   | 0.4681              | 0.5230 | 0.5990 | 0.2710                | 0.2547 | 0.2949 | 0.4511                  | 0.4503 | 0.4512 |
|            | 20%                   | 0.6601              | 0.6890 | 0.7472 | 0.4760                | 0.4087 | 0.4249 | 0.6508                  | 0.6425 | 0.6427 |
|            | 30%                   | 0.8103              | 0.8298 | 0.8794 | 0.6457                | 0.5732 | 0.5826 | 0.8032                  | 0.7935 | 0.7936 |
|            | 40%                   | 0.9336              | 0.9487 | 0.9929 | 0.7901                | 0.7214 | 0.7279 | 0.9279                  | 0.9178 | 0.9178 |
|            | 50%                   | 1.0294              | 1.0420 | 1.0825 | 0.9030                | 0.8360 | 0.8404 | 1.0244                  | 1.0146 | 1.0146 |
|            | 60%                   | 1.1202              | 1.1311 | 1.1687 | 1.0093                | 0.9507 | 0.9584 | 1.1155                  | 1.1061 | 1.1061 |
| Hemisphere | 10%                   | 0.4520              | 0.5123 | 0.5946 | 0.2583                | 0.2421 | 0.2758 | 0.4333                  | 0.4339 | 0.4350 |
|            | 20%                   | 0.6277              | 0.6614 | 0.7267 | 0.4345                | 0.3715 | 0.3894 | 0.6170                  | 0.6093 | 0.6097 |
|            | 30%                   | 0.7683              | 0.7926 | 0.8486 | 0.5921                | 0.5218 | 0.5340 | 0.7603                  | 0.7511 | 0.7513 |
|            | 40%                   | 0.8897              | 0.9075 | 0.9574 | 0.7319                | 0.6578 | 0.6682 | 0.8835                  | 0.8732 | 0.8733 |
|            | 50%                   | 0.9901              | 1.0054 | 1.0506 | 0.8484                | 0.7803 | 0.7874 | 0.9845                  | 0.9747 | 0.9747 |
|            | 60%                   | 1.0803              | 1.0936 | 1.1359 | 0.9554                | 0.8928 | 0.9000 | 1.0753                  | 1.0656 | 1.0657 |

**Table S2.** The RMSE (m) of CHM<sub>Reference</sub> and CHM<sub>Pit-free</sub> with different thresholds in different proportion of pits.

|            | Proportion<br>of pits | Thresholds |        |        |        |        |        |        |
|------------|-----------------------|------------|--------|--------|--------|--------|--------|--------|
|            |                       | 1          | 5      | 10     | 15     | 20     | 25     | 30     |
| Cone       | 10%                   | 0.4667     | 0.2798 | 0.2230 | 0.2195 | 0.2195 | 0.2195 | 0.2195 |
|            | 20%                   | 0.7368     | 0.4909 | 0.4041 | 0.3896 | 0.3896 | 0.3896 | 0.3896 |
|            | 30%                   | 0.9233     | 0.6618 | 0.5538 | 0.5254 | 0.5254 | 0.5254 | 0.5254 |
|            | 40%                   | 1.0682     | 0.7953 | 0.6788 | 0.6466 | 0.6437 | 0.6437 | 0.6437 |
|            | 50%                   | 1.1662     | 0.9067 | 0.7801 | 0.7416 | 0.7355 | 0.7355 | 0.7355 |
|            | 60%                   | 1.2581     | 0.9937 | 0.8702 | 0.8326 | 0.8271 | 0.8271 | 0.8271 |
| Hemisphere | 10%                   | 0.4623     | 0.2746 | 0.2158 | 0.2124 | 0.2124 | 0.2124 | 0.2124 |
|            | 20%                   | 0.7122     | 0.4689 | 0.3800 | 0.3563 | 0.3563 | 0.3563 | 0.3563 |
|            | 30%                   | 0.8944     | 0.6289 | 0.5138 | 0.4850 | 0.4817 | 0.4817 | 0.4817 |

|     |        |        |        |        |        |        |        |
|-----|--------|--------|--------|--------|--------|--------|--------|
| 40% | 1.0241 | 0.7619 | 0.6488 | 0.6033 | 0.5956 | 0.5956 | 0.5956 |
| 50% | 1.1405 | 0.8739 | 0.7425 | 0.6993 | 0.6920 | 0.6920 | 0.6920 |
| 60% | 1.2334 | 0.9811 | 0.8414 | 0.7922 | 0.7805 | 0.7805 | 0.7805 |

**Table S3.** The RMSE (m) of CHM<sub>Reference</sub> and CHM<sub>Spike-free</sub> with different parameters in different proportion of pits.

|            | Proportion | Freeze distance/Insertion buffer |         |         |         |         |         |         |         |         |
|------------|------------|----------------------------------|---------|---------|---------|---------|---------|---------|---------|---------|
|            | of pits    | 0.1/0.5                          | 0.2/0.5 | 0.3/0.3 | 0.3/0.4 | 0.3/0.5 | 0.4/0.3 | 0.4/0.4 | 0.4/0.5 | 0.4/0.6 |
| Cone       | 10%        | 0.8279                           | 0.3604  | 0.1429  | 0.1494  | 0.1537  | 0.1626  | 0.1611  | 0.1613  | 0.1625  |
|            | 20%        | 0.8282                           | 0.3577  | 0.1430  | 0.1516  | 0.1464  | 0.1624  | 0.1588  | 0.1602  | 0.1612  |
|            | 30%        | 0.9740                           | 0.3778  | 0.1463  | 0.1512  | 0.1546  | 0.1644  | 0.1654  | 0.1648  | 0.1686  |
|            | 40%        | 1.0839                           | 0.3828  | 0.1559  | 0.1564  | 0.1627  | 0.1744  | 0.1712  | 0.1737  | 0.1747  |
|            | 50%        | 1.1522                           | 0.3716  | 0.1560  | 0.1564  | 0.1560  | 0.1729  | 0.1742  | 0.1707  | 0.1781  |
|            | 60%        | 1.2154                           | 0.3663  | 0.1572  | 0.1550  | 0.1590  | 0.1714  | 0.1711  | 0.1707  | 0.1697  |
| Hemisphere | 10%        | 0.5815                           | 0.2943  | 0.1356  | 0.1352  | 0.1377  | 0.1479  | 0.1491  | 0.1481  | 0.1491  |
|            | 20%        | 0.7990                           | 0.3517  | 0.1481  | 0.1481  | 0.1548  | 0.1580  | 0.1616  | 0.1554  | 0.1586  |
|            | 30%        | 0.9386                           | 0.3715  | 0.1464  | 0.1522  | 0.1511  | 0.1602  | 0.1598  | 0.1579  | 0.1605  |
|            | 40%        | 1.0481                           | 0.3746  | 0.1519  | 0.1519  | 0.1501  | 0.1575  | 0.1631  | 0.1605  | 0.1610  |
|            | 50%        | 1.1310                           | 0.3751  | 0.1540  | 0.1578  | 0.1639  | 0.1631  | 0.1661  | 0.1660  | 0.1688  |
|            | 60%        | 1.1949                           | 0.3699  | 0.1572  | 0.1606  | 0.1576  | 0.1660  | 0.1638  | 0.1659  | 0.1718  |

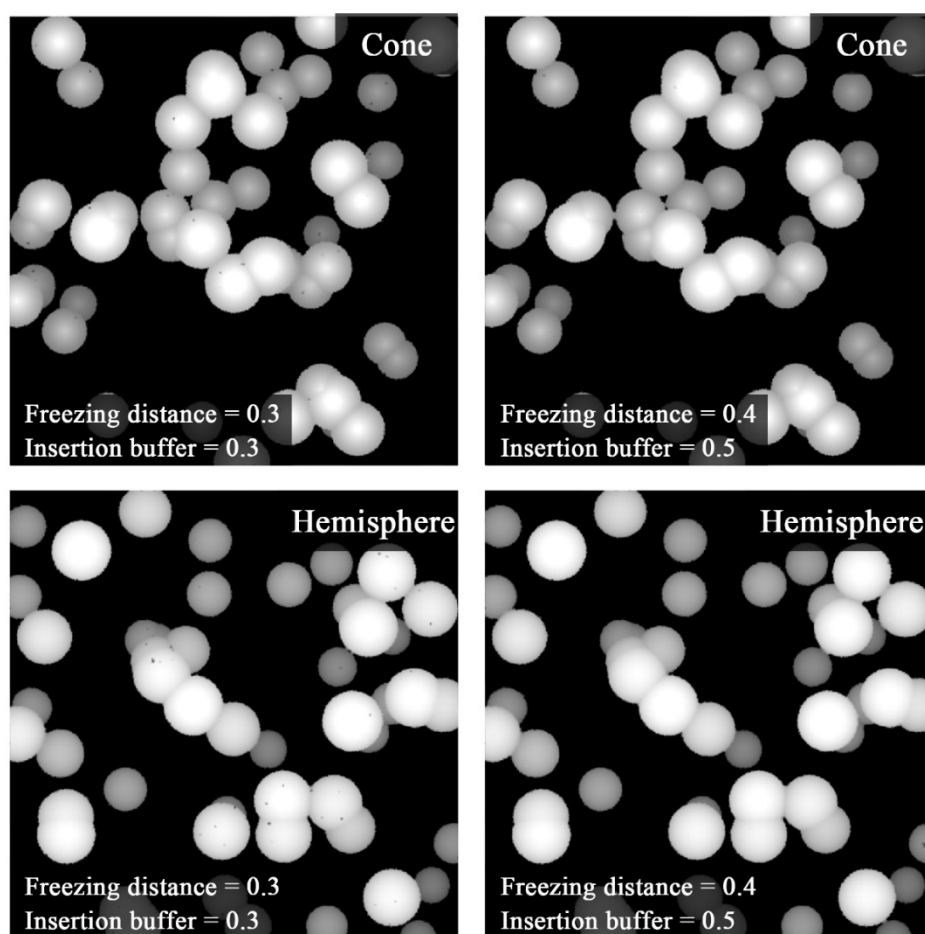

**Figure S1.** The visual effect of CHM<sub>Spike-free</sub> with different parameters.

**Table S4.** The RMSE (m) of CHM<sub>Reference</sub> and CHM<sub>GPMF</sub> with different SI in different proportion of pits.

|            | Proportion<br>of pits | 0      | 1      | 2      | 3      | 4      | 5      | 6      | 7      | 8      | 9      | 10     |
|------------|-----------------------|--------|--------|--------|--------|--------|--------|--------|--------|--------|--------|--------|
| Cone       | 10%                   | 0.0952 | 0.0952 | 0.0952 | 0.0952 | 0.0952 | 0.0955 | 0.0958 | 0.0962 | 0.0974 | 0.0984 | 0.1001 |
|            | 20%                   | 0.1096 | 0.1096 | 0.1096 | 0.1095 | 0.1096 | 0.1100 | 0.1107 | 0.1121 | 0.1136 | 0.1151 | 0.1178 |
|            | 30%                   | 0.1160 | 0.1160 | 0.1160 | 0.1160 | 0.1161 | 0.1166 | 0.1173 | 0.1185 | 0.1204 | 0.1231 | 0.1258 |
|            | 40%                   | 0.1282 | 0.1282 | 0.1282 | 0.1282 | 0.1283 | 0.1288 | 0.1297 | 0.1311 | 0.1339 | 0.1379 | 0.1428 |
|            | 50%                   | 0.1336 | 0.1336 | 0.1336 | 0.1336 | 0.1337 | 0.1336 | 0.1345 | 0.1365 | 0.1392 | 0.1426 | 0.1464 |
|            | 60%                   | 0.1369 | 0.1369 | 0.1369 | 0.1369 | 0.1370 | 0.1370 | 0.1378 | 0.1396 | 0.1427 | 0.1459 | 0.1506 |
| Hemisphere | 10%                   | 0.0982 | 0.0982 | 0.0983 | 0.0983 | 0.0975 | 0.0977 | 0.0983 | 0.0993 | 0.1005 | 0.1027 | 0.1057 |
|            | 20%                   | 0.1096 | 0.1096 | 0.1096 | 0.1091 | 0.1090 | 0.1091 | 0.1101 | 0.1116 | 0.1133 | 0.1153 | 0.1181 |
|            | 30%                   | 0.1150 | 0.1150 | 0.1150 | 0.1151 | 0.1149 | 0.1150 | 0.1162 | 0.1177 | 0.1196 | 0.1216 | 0.1249 |
|            | 40%                   | 0.1226 | 0.1226 | 0.1226 | 0.1229 | 0.1220 | 0.1224 | 0.1235 | 0.1253 | 0.1277 | 0.1301 | 0.1339 |
|            | 50%                   | 0.1322 | 0.1322 | 0.1322 | 0.1317 | 0.1311 | 0.1317 | 0.1329 | 0.1348 | 0.1376 | 0.1420 | 0.1466 |
|            | 60%                   | 0.1356 | 0.1356 | 0.1356 | 0.1356 | 0.1351 | 0.1354 | 0.1371 | 0.1392 | 0.1446 | 0.1485 | 0.1543 |
